# Supplementary material
Source: PubMed Central journal article supplement (PMC8044910)
Supplement: NIHMS1651496-supplement-Supplementary_Figures.pdf [file NIHMS1651496-supplement-Supplementary_Figures.pdf]

## Supplementary Figure S1

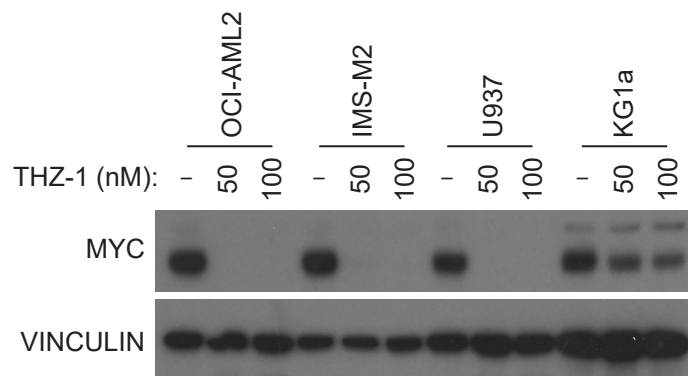

**Figure S1: CDK7 inhibitor, THZ-1, decreases MYC expression in AML cells.**

Immunoblot for MYC and VINCULIN (loading control) from indicated human AML cell lines treated with indicated THZ-1 concentrations for 24 hours.

## Supplementary Figure S2

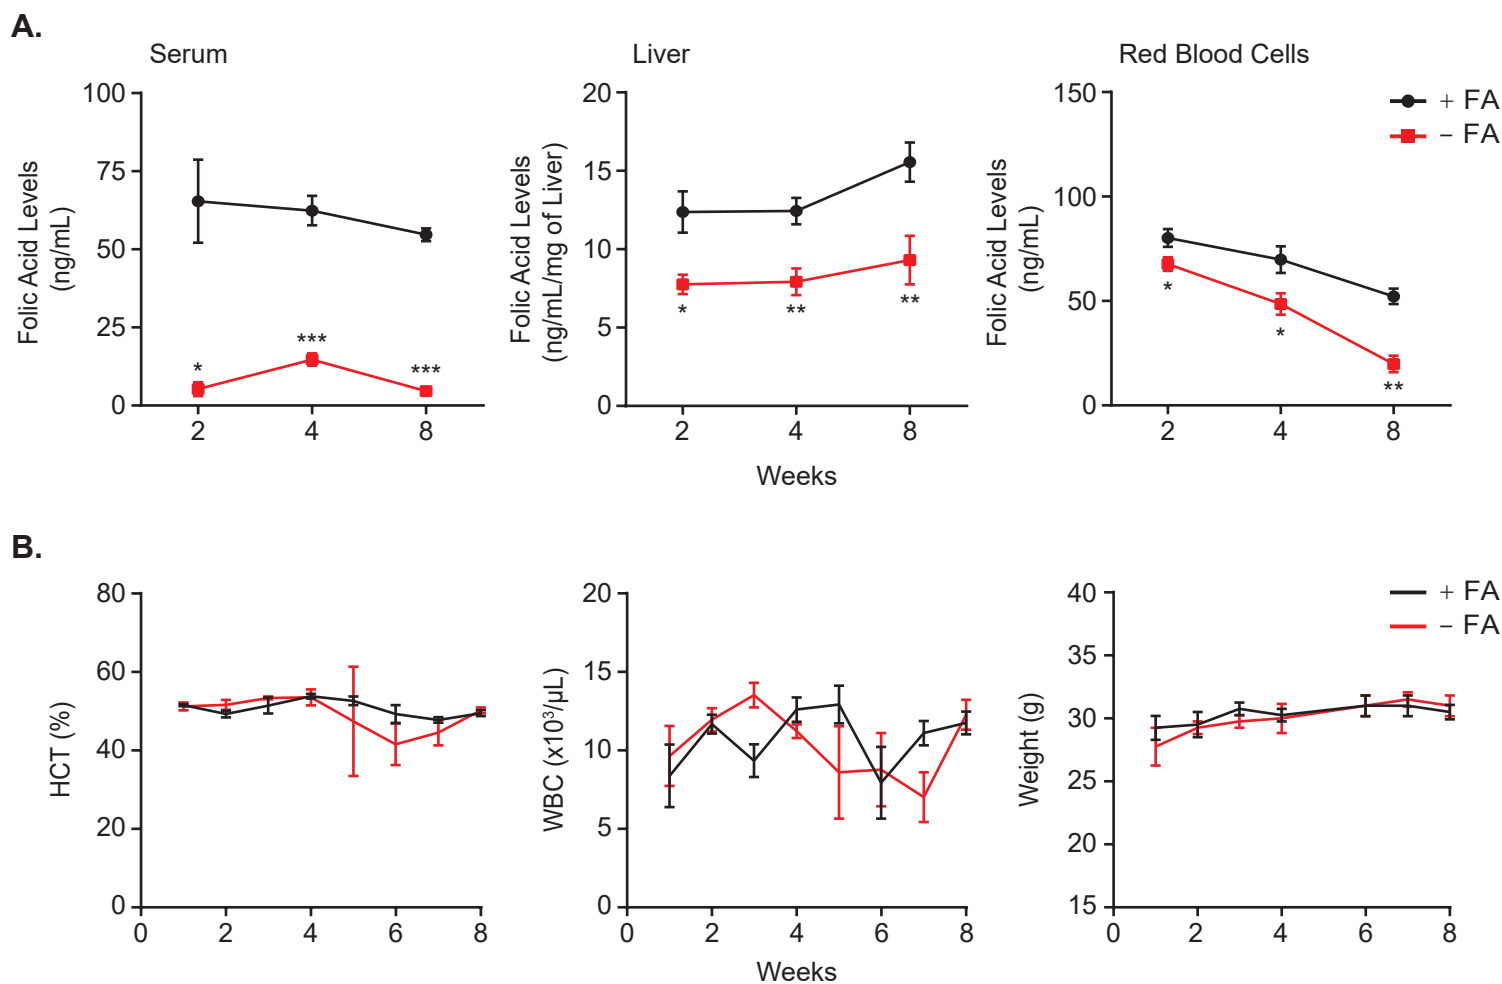

**Figure S2: Folic acid withdrawal does not significantly affect mouse hematocrit, white blood count, and weight.**

**(A)** Folic acid levels in serum, liver, and red blood cells (RBC) over a period of 8 weeks from three mice per group fed with either regular or folic acid-restricted diet. \*p-value  $\leq 0.05$ , \*\*  $\leq 0.01$ , and \*\*\*  $\leq 0.001$  by Welch's t-test. Error bars represent mean  $\pm$  SD.

**(B)** Effect of regular or folic acid-restricted diet on mouse hematocrit (HCT), white blood cell count (WBC), and weight over a period of 8 weeks from four mice per group. Error bars represent mean  $\pm$  SD of four technical replicates.

## Supplementary Figure S3

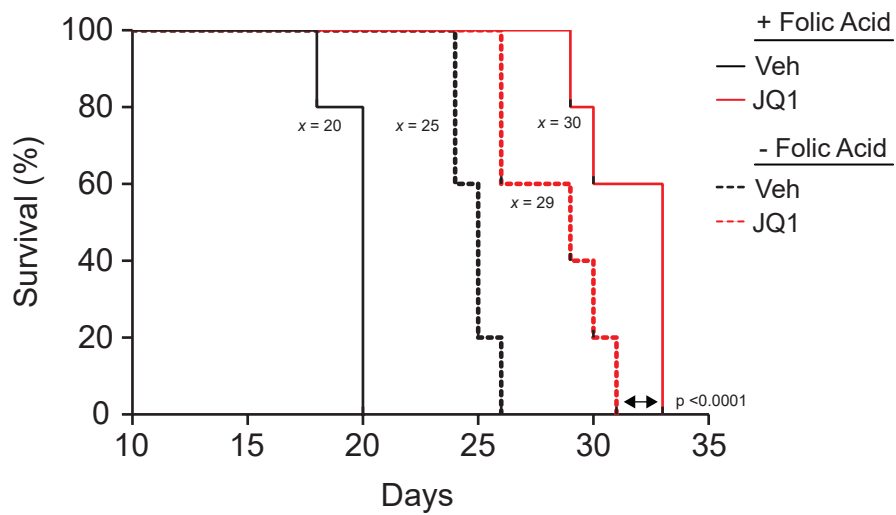

**Figure S3: Folic acid withdrawal attenuates leukemic blast response to JQ1.**

Kaplan-Meier curves showing overall survival of mice ( $n = 5$  for each group) transplanted with MLL-AF9-positive blasts, fed with either regular or folic acid-restricted diet and treated with either vehicle or 35mg/kg JQ1 for 7 days. X, median survival. Statistical significance by log-rank (Mantel-Cox) test.

## Supplementary Figure S4

A.

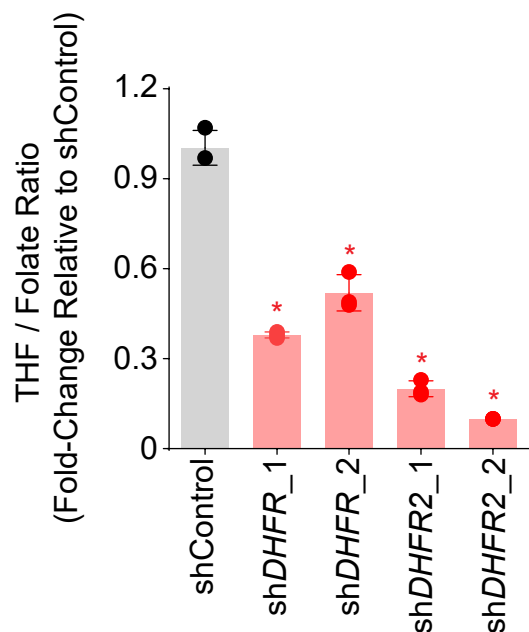

B.

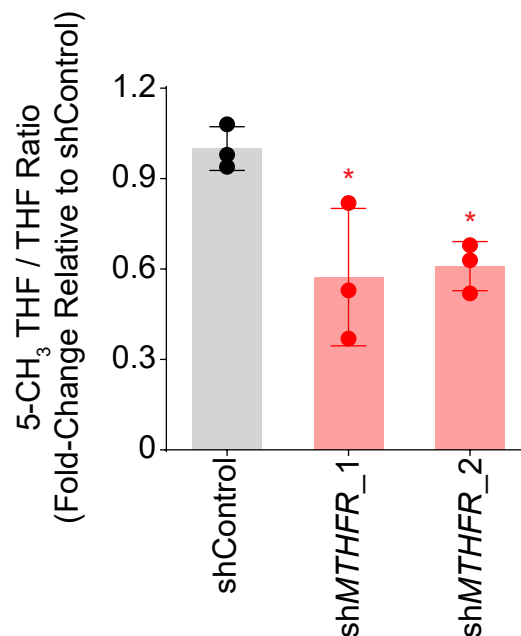

**Figure S4: *DHFR*, *DHFR2*, and *MTHFR* knockdown impairs ratios of their respective primary and end-product metabolites.**

**(A)** Fold change in THF/Folate ratio in IMS-M2 cells infected with either a control, two *DHFR*-directed shRNAs (sh*DHFR*\_1 and sh*DHFR*\_2), or *DHFR2*-directed shRNAs (sh*DHFR2*\_1 and sh*DHFR2*\_2).

**(B)** Fold change in 5-CH<sub>3</sub> THF/THF ratio in IMS-M2 cells infected with either a control or two *MTHFR*-directed shRNAs (sh*MTHFR*\_1 and sh*MTHFR*\_2).

**(A-B)** \*p-value  $\leq 0.05$  by t-test. Error bars represent mean  $\pm$  SD of three biological replicates.

## Supplementary Figure S5

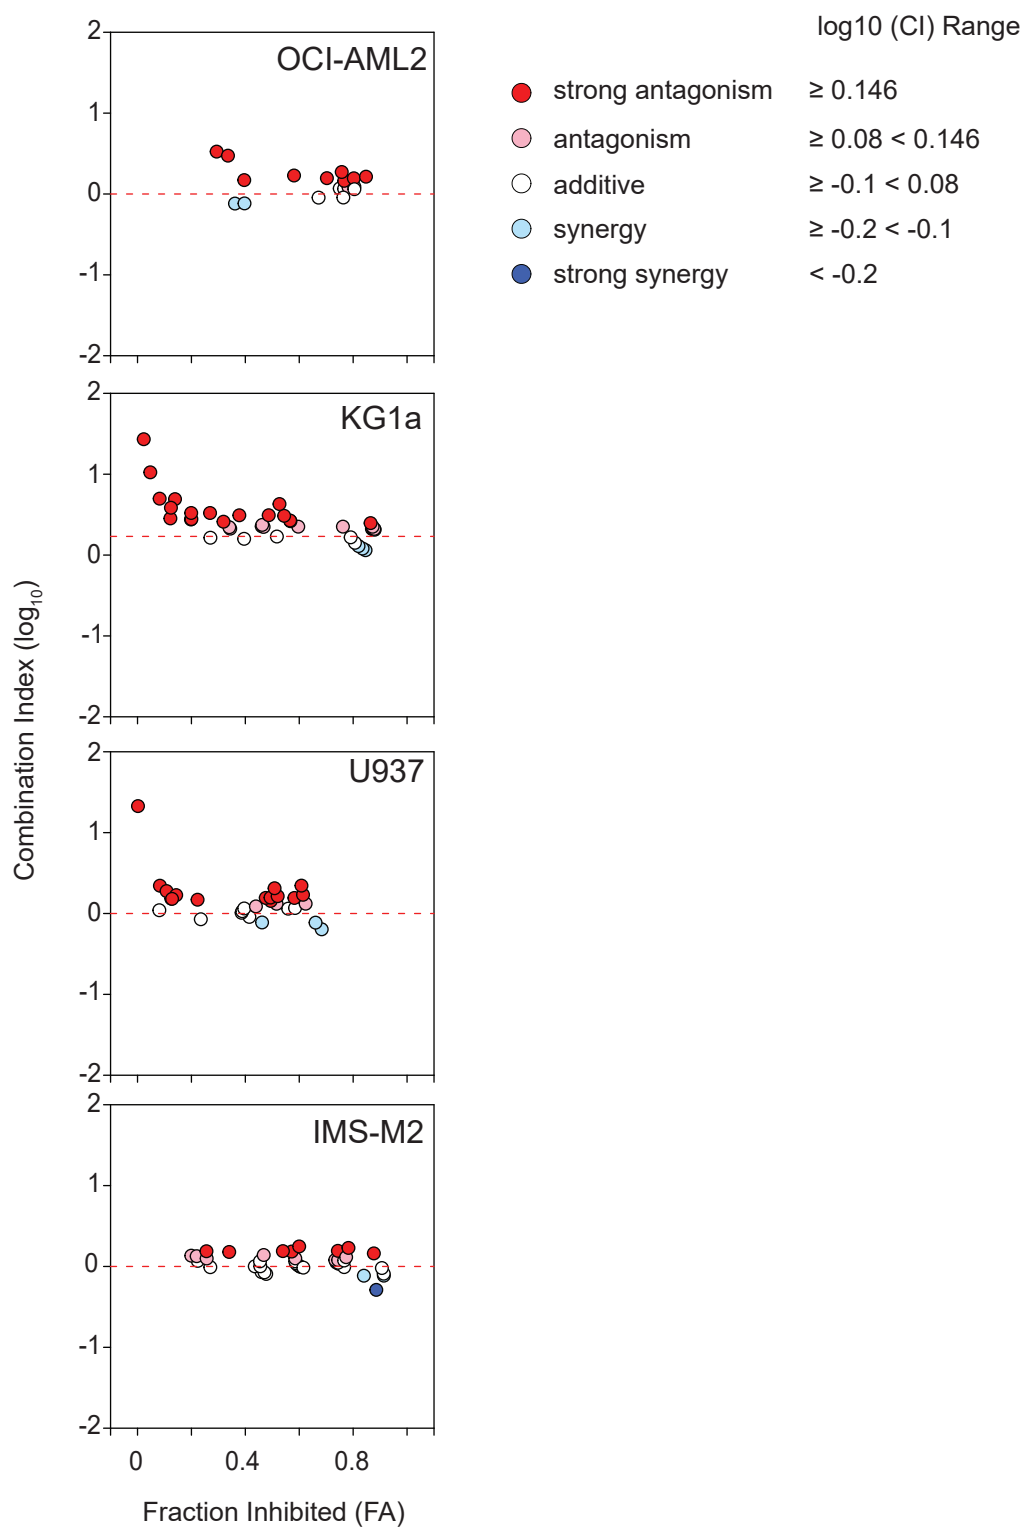

**Figure S5: Methotrexate and OTX015 are antagonistic in various AML cell lines.**

Combination index analysis for the combinations of OTX015 with Methotrexate in the indicated cell lines treated for 3 days in four technical replicates.

## Supplementary Figure S6

**A.**

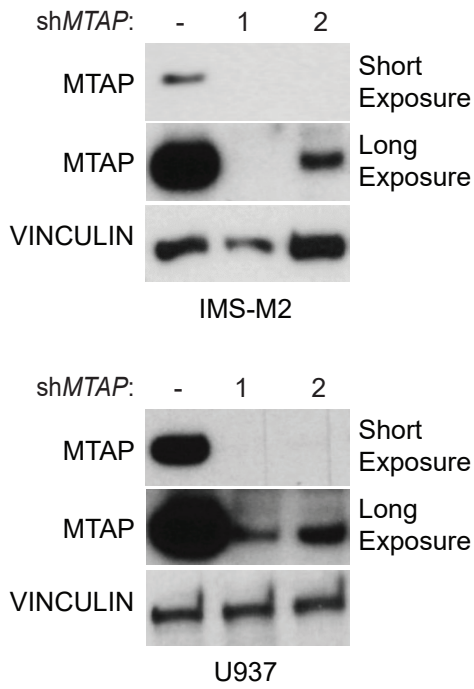

**B.**

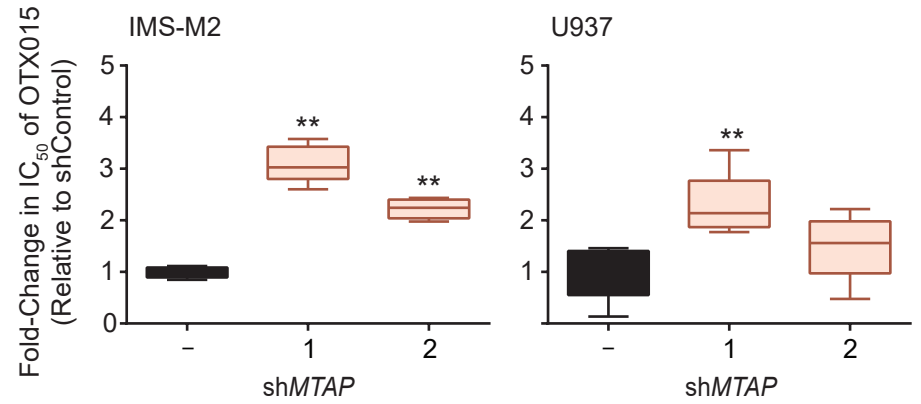

**Figure S6: *MTAP* suppression modulates response to BET inhibitors.**

**(A)** Immunoblot for MTAP and VINCULIN (loading control) from human IMS-M2 and U937 cell lines infected with either a control or two *MTAP*-directed shRNAs.

**(B)** Fold change in IC<sub>50</sub> of OTX015 for 5 days in IMS-M2 and U937 cell lines infected with either a control or two *MTAP*-directed shRNAs (sh*MTAP*\_1 or sh*MTAP*\_2). Results shown as fold change of IC<sub>50</sub> normalized to average shControl. \*\*p-value ≤ 0.01 by nonparametric Mann-Whitney test. Error bars represent mean ± SD of five technical replicates.

## Supplementary Figure S7

A.

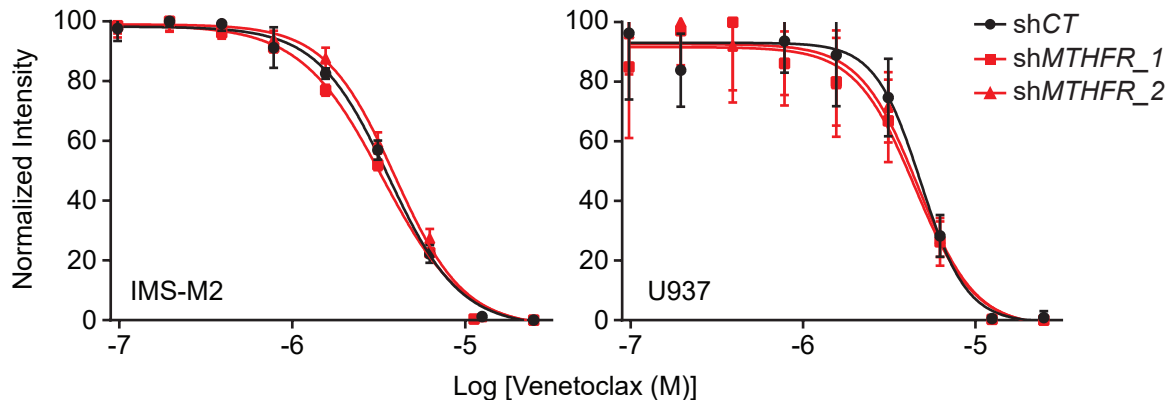

B.

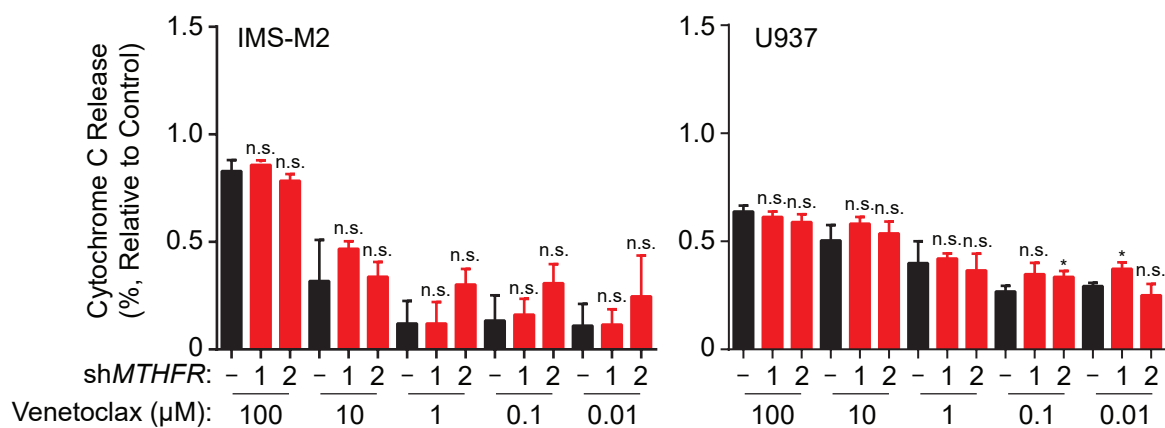

**Figure S7: MTHFR suppression does not alter AML cell response to venetoclax.**

**(A)** Growth inhibition of indicated IMS-M2 and U937 cells infected with either a control or two *MTHFR*-directed shRNAs (sh*MTHFR*\_1 and sh*MTHFR*\_2) and treated with increasing concentration of venetoclax for 5 days. Error bars represent mean  $\pm$  SD of five technical replicates.

**(B)** BH3 profiling of IMS-M2 and U937 AML cell lines infected with either a control or two *MTHFR*-directed shRNAs (sh*MTHFR*\_1 and sh*MTHFR*\_2) exposed to DMSO or serial concentrations of venetoclax for 1 hour. \**p*-value  $\leq$  0.05 by Welch's *t*-test. n.s., nonsignificant (*p* > 0.05). Error bars represent mean  $\pm$  SD.

## Supplementary Figure S8

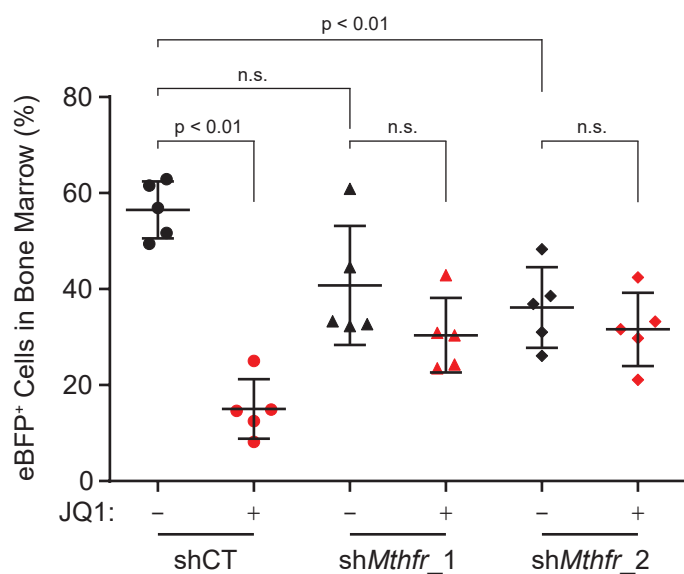

**Figure S8: MTHFR suppression attenuates the anti-leukemic effect of JQ1 in an Cbfb-MYH11-driven AML mouse model.**

Proportion of eBFP-positive Cbfb-MYH11-driven leukemic cells infected with either a control (shCT) or two *Mthfr*-directed shRNAs (shMthfr<sub>1</sub> and shMthfr<sub>2</sub>) in bone marrow from five mice per group treated with either vehicle or 35mg/kg JQ1 for 7 days. p-value by Mann-Whitney test. n.s, nonsignificant ( $p > 0.05$ ). Error bars represent mean  $\pm$  SD.



## Supplementary Figure S9

A.

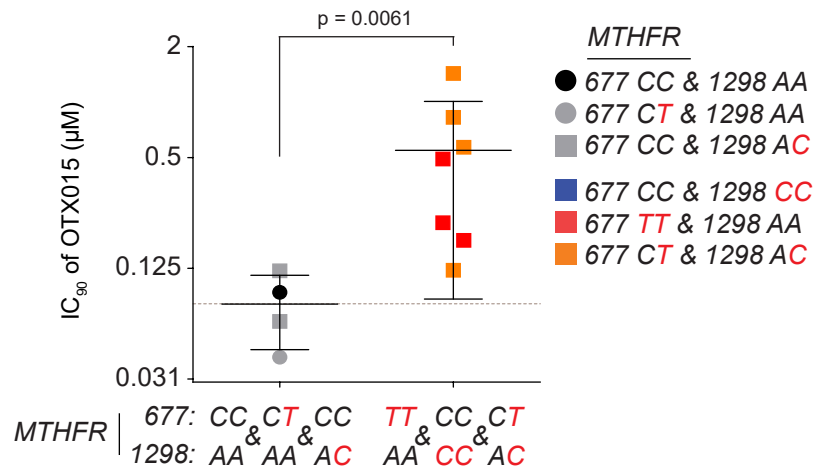

B.

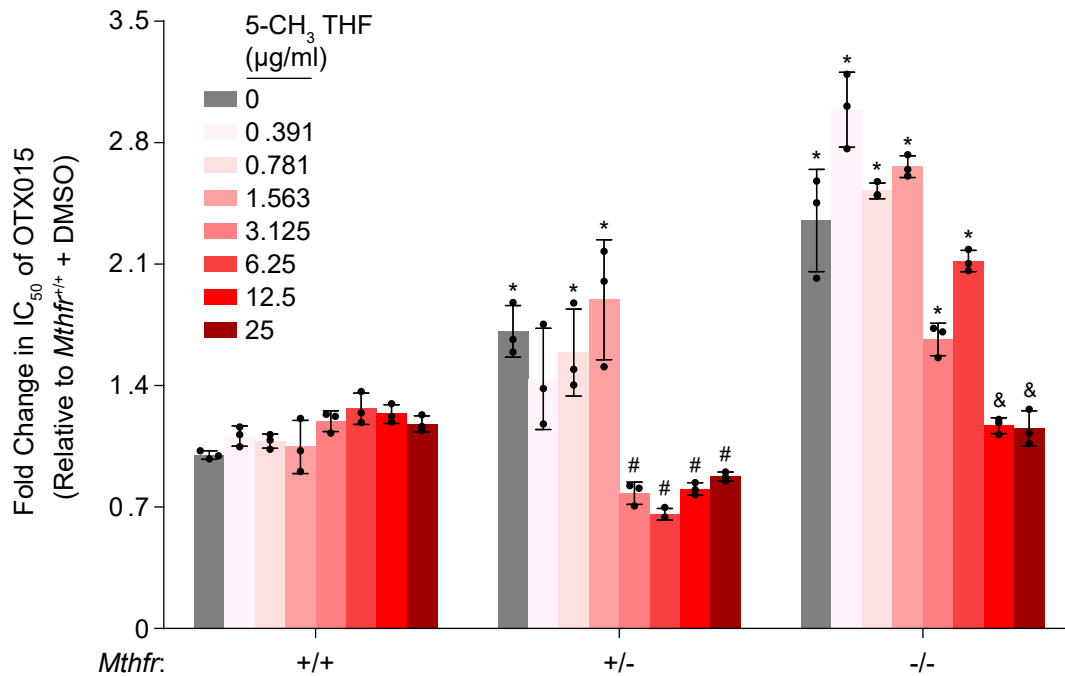

**Figure S9: Effect of MTHFR impairment on response to OTX015.**

(A) Distribution of IC<sub>90</sub> with OTX015 for 5 days of 11 patient samples with Core Binding Factor (CBF) AML divided into 2 subgroups according to *MTHFR* genetic status at C677, A1298. *p*-value by nonparametric Mann-Whitney test. Error bars represent mean ± SD.

(B) Fold change in IC<sub>50</sub> of OTX015 for 5 days in *MLL-AF9*-driven homozygous wild-type (+/+), heterozygous (+/-), and homozygous (-/-) *Mthfr* knockout cells treated with increasing concentration of 5-CH<sub>3</sub> THF. \**p*-value ≤ 0.001 by two-way ANOVA test in comparison with the analogous concentration of 5-CH<sub>3</sub> THF in +/+ *Mthfr* cells, # ≤ 0.001 in comparison with 0 µg/ml 5-CH<sub>3</sub> THF condition in +/- *Mthfr* cells, & ≤ 0.001 in comparison with 0 µg/ml 5-CH<sub>3</sub> THF condition in -/- *Mthfr* cells. Error bars represent mean ± SD.

## Supplementary Figure S10

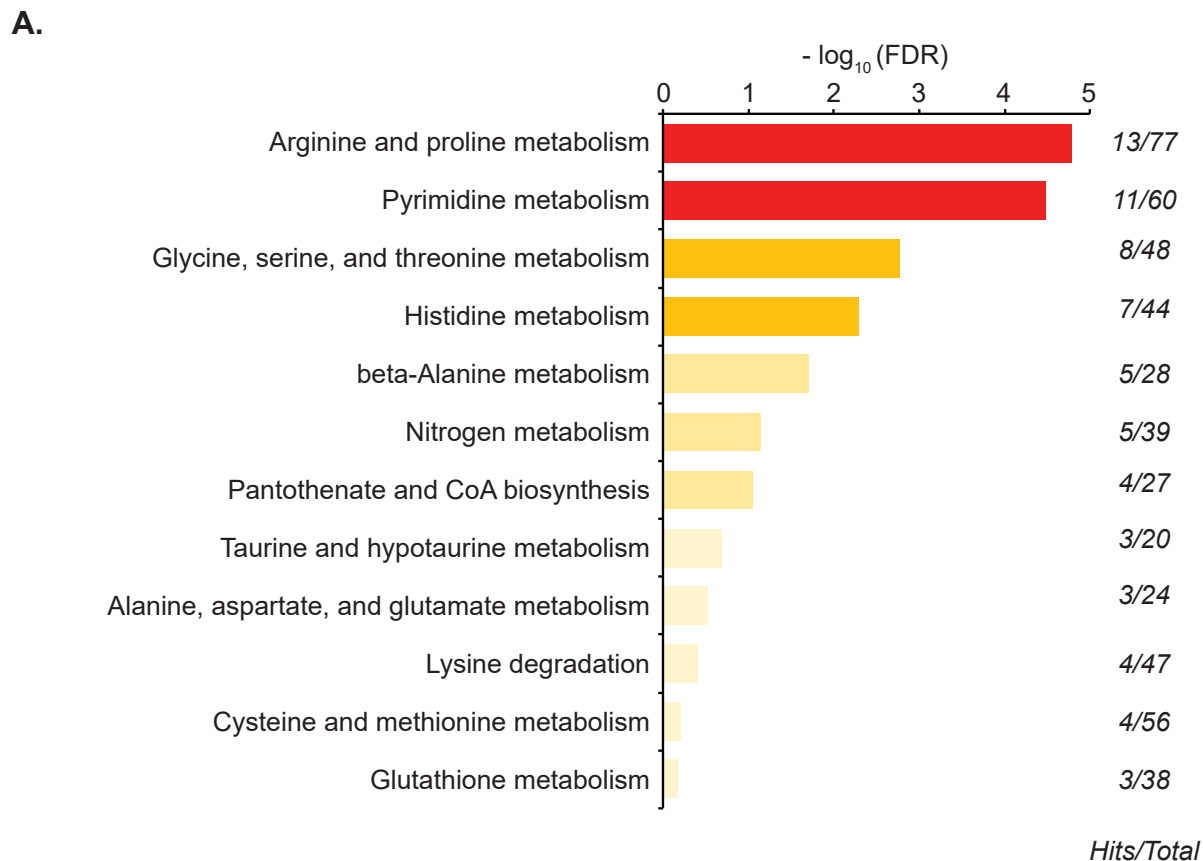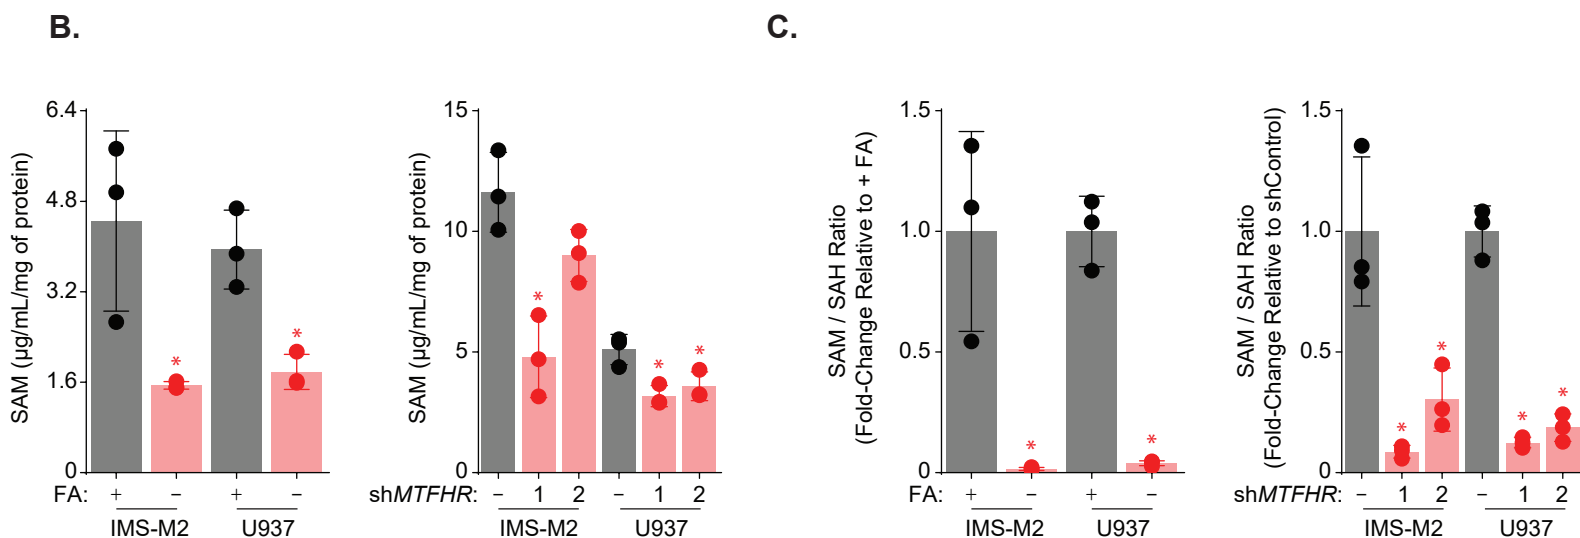

**Figure S10: Metabolic perturbations induced by folate starvation in AML cells.**

**(A)** Pathway analysis integrating enrichment and pathway topology analyses (MetaboAnalyst) of top metabolites from panel **(A)** in Figure 4. Pathways ranked by FDR. “Hits” represents number of metabolites that scored in steady-state profile and “Total” represents number of metabolites present in given metabolic pathway.

**(B-C)** SAM levels **(B)** and **(C)** SAM/SAH ratio in indicated human AML cell lines with folic acid (FA) withdrawal (left panel) or MTHFR suppression using two *MTHFR*-directed shRNAs (sh*MTHFR*\_1 and sh*MTHFR*\_2, right panel). \*p-value  $\leq 0.05$  by Welch’s t-test versus respective control. Error bars represent mean  $\pm$  SD of three technical replicates.

**(A-C)** + FA = 1000 ng/mL folic acid, - FA = 0 ng/mL folic acid.

# Supplementary Figure S11

**A.**

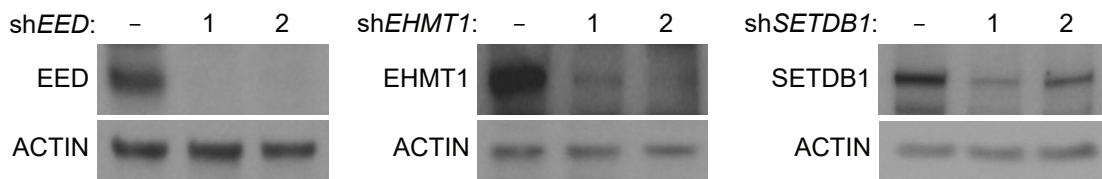

**B.**

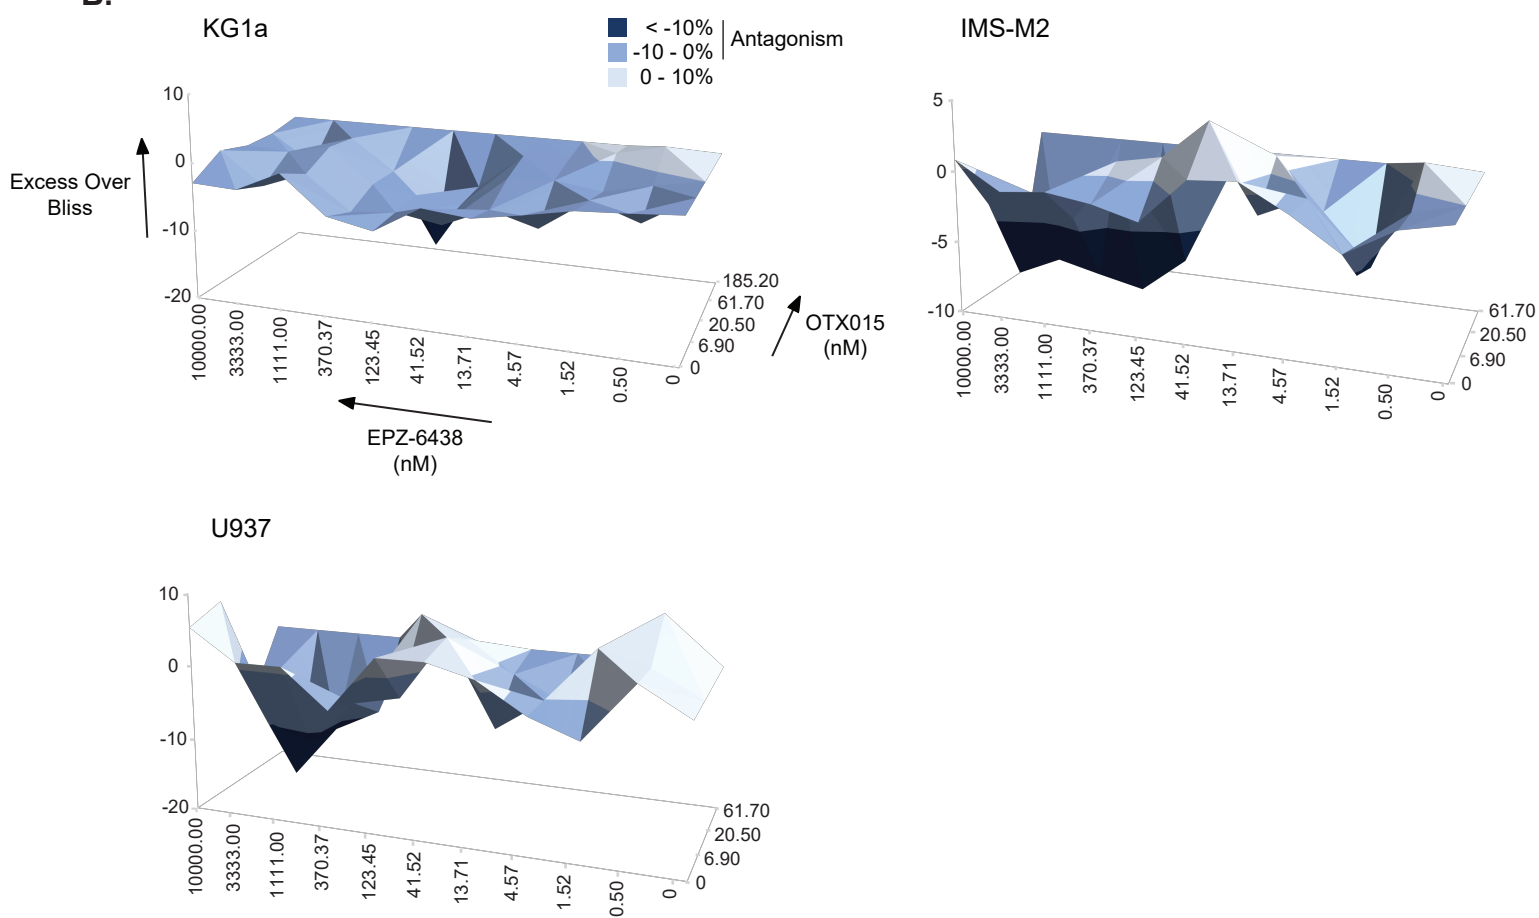

**Figure S11: CRISPR screen hit validation.**

**(A)** Immunoblot confirming EED, EHMT1, and SETDB1 knockdown using two hairpins against each target. ACTIN used as loading control.

**(B)** Excess over bliss for KG1a, IMS-M2 and U937 exposed to a combination of OTX015 and EPZ-3468 for 5 days. Average of four replicates  $\pm$  SD.

## Supplementary Figure S12

**A.**

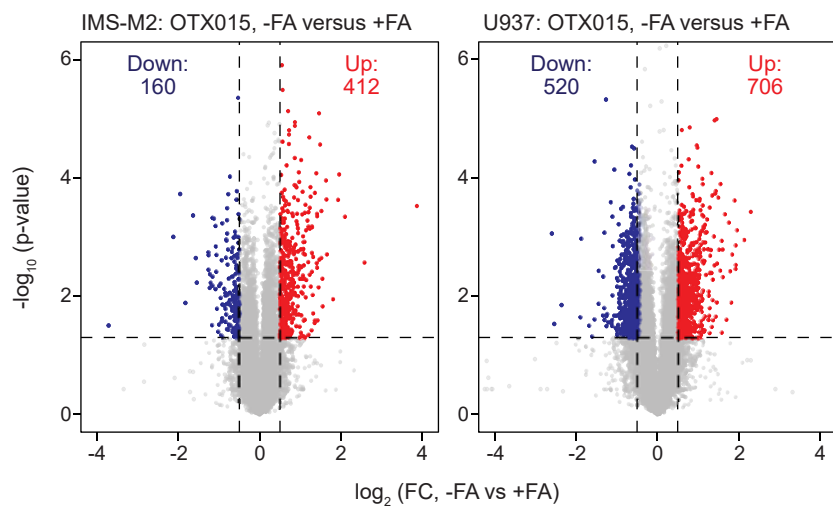

**B.**

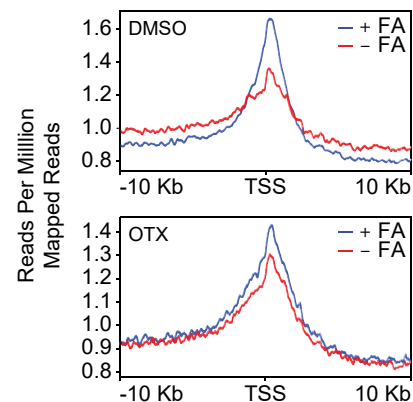

**Figure S12: Transcriptional and epigenetic changes induced by folate starvation in AML cells.**

**(A)** Volcano plots highlighting genes differentially expressed in - folic acid (-FA) versus control (+FA) in OTX015-treated IMS-M2 and U937 cells. Number of differentially expressed genes shown in blue and red for down- and up-regulated genes.

**(B)** Metaplot for average H3K27me3 signal within 10Kb-region flanking gene transcriptional starting sites (TSS) with folic acid starvation (-FA) in DMSO- and OTX015-treated U937 cells.

## Supplementary Figure S13

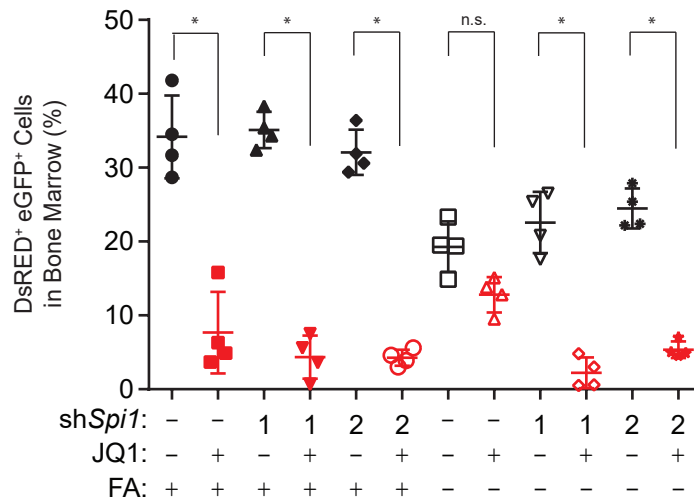

**Figure S13: *Spi1* knockdown alleviates the resistance to JQ1 mediated by folic acid withdrawal.**

Proportion of DsRed- and eBFP-positive MLL-AF9 leukemic cells infected with either a control (shCT) or two *Spi1*-directed shRNAs (sh*Spi1\_1* and sh*Spi1\_2*) in bone marrow from four mice per group fed with either regular or folic acid-restricted diet and treated with either vehicle or 35mg/kg JQ1 for 7 days. \*p-value ≤ 0.05 by Mann-Whitney test. n.s, nonsignificant (p > 0.05). Error bars represent mean ± SD.
